# Supplementary material for: Determination of the wingsnap sonation mechanism of the Golden-collared manakin (Manacus vitellinus)
Source: Oxford University Press journal article supplement (doi:10.1242/jeb.128231), 2016-01-01
Supplement: jeb128231supp.pdf [file jeb128231supp.pdf]

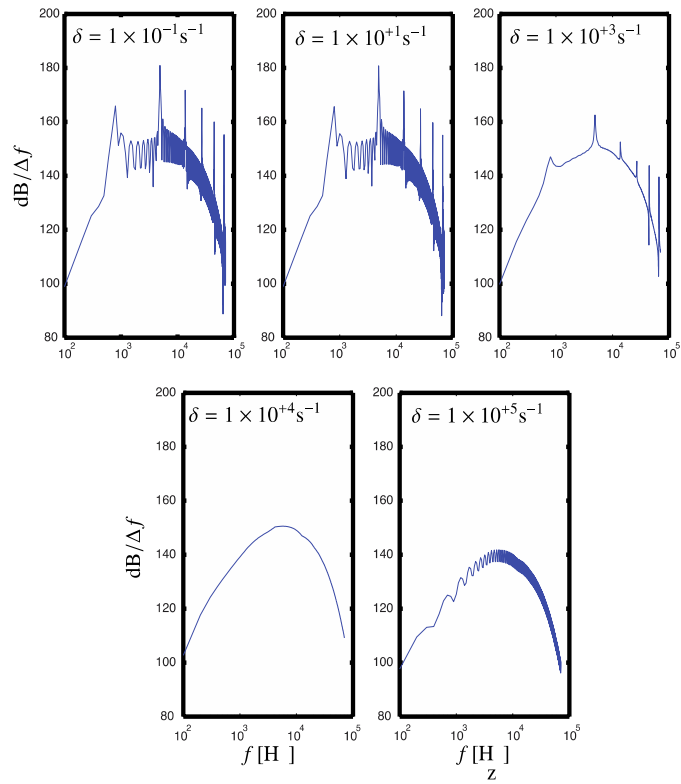

Fig. S1. Pressure spectra for fixed contact time constant  $t = 2 \times 10^{-3}$  s and a range of damping parameters.

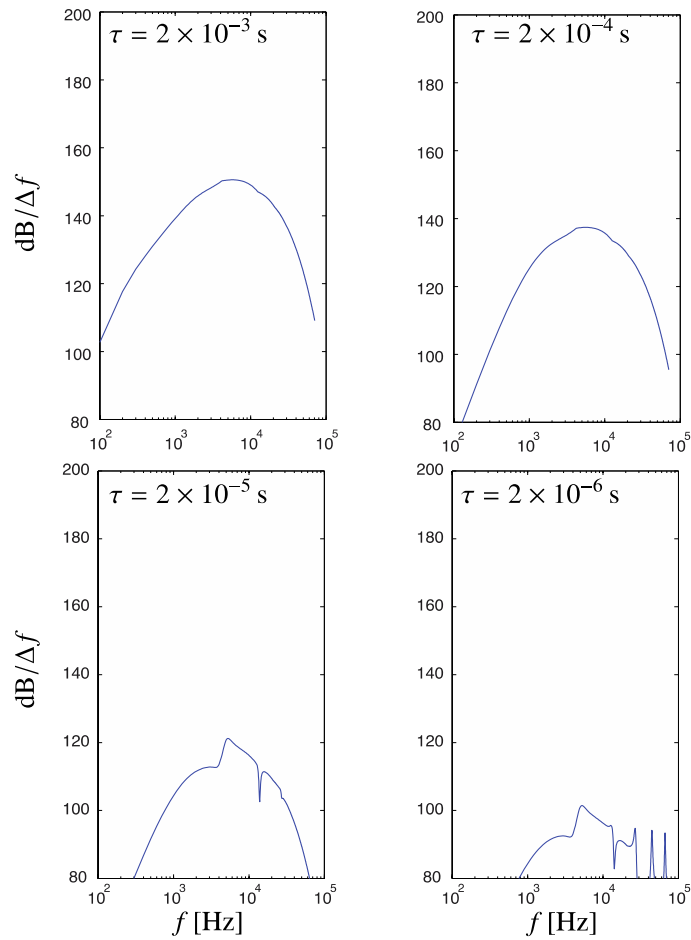

Fig. S2. Pressure spectra for fixed damping  $\delta = 1 \times 10^4 \text{ s}^{-1}$  and a range of contact time constants.
